# Supplementary material for: Active Tuberculosis Case Finding in Port-au-Prince, Haiti: Experiences, Results, and Implications for Tuberculosis Control Programs
Source: Hindawi journal article supplement (doi:10.1155/2016/8020745), 2016-01-01
Supplement: f1 [file 8020745.f1.pdf]

**Supplementary Table S1:** Sputum quality assessment and grading system used at the Baltimore Laboratory [13-15]

| Properties                                     | Grading                                                                                                                                |                                                                                                                                                                                  |
|------------------------------------------------|----------------------------------------------------------------------------------------------------------------------------------------|----------------------------------------------------------------------------------------------------------------------------------------------------------------------------------|
|                                                | Good                                                                                                                                   | Poor                                                                                                                                                                             |
| 1. Sputum Quality                              | Presences of >25 leucocytes/field at 100X                                                                                              | Absence or >5 of leucocytes in the smear.<br>Presence of more than 10 epithelial cells/field                                                                                     |
| 2. Size                                        | 1-2cm X 2-3cm<br>Oval in shape and smear centrally placed in the slide                                                                 | Smear size smaller than 1-2cm X 2-3cm and larger than 1-2cm X 2-3cm<br>Irregular shape. Smear placed not centrally                                                               |
| 3. Evenness                                    | Sputum spread evenly on the glass slide not too thick not too thin                                                                     | Smear too thick or too thin                                                                                                                                                      |
| 4. Thickness                                   | Mono-layer smear on the glass slide<br>Whole depth of the smear layer can be focused sharply in each field                             | Smear too thick with over-lapping cells seen in entire smear.<br>Smear too thin<br>Whole depth of the smear layer can be focused sharply in less than 50% of the field           |
| 5. Cleanness                                   | Clean smear. Smear free from stain deposit, crystals produced by overheating of stain and poor maintenance of dyes. Absence of debris. | Dirty smear, cannot screen the smear on the slide.<br>Smear found with stain deposits, crystals and debris.                                                                      |
| 6. Staining quality by microscopic observation | AFB and background clearly distinguished.<br>AFB bright red in color.<br>Leucocytes stained blue and absence of stain particles.       | Not able to distinguish AFB and background.<br>AFB faintly red in color.<br>Fuchsin color remaining on the background<br>Methylene blue color remaining on the un-stained parts. |

**Supplementary Table S2:** Sputum quality assessment at Haiti's National Laboratory (LNSP)

| Properties        | Assessment                                        |
|-------------------|---------------------------------------------------|
| 1. Sputum Quality | Presence of epithelial cells and white cells      |
| 2. Size           | 2x1 cm in the center of the slide                 |
| 3. Thickness      | Able to read a printed text through the dry smear |
| 4. Color          | AFB bright red on a blue background               |
